# Supplementary material
Source: publisher figshare collection journal article supplement (https://karger.figshare.com/ndownloader/files/7841563)
Supplement: Supplementary file 1 [file 7841563]

| **Table S2.** Sequences of primers for qRT-PCR in this study | | | | |
| --- | --- | --- | --- | --- |
|  | | | | |
| Primer name |  | Primers (5'-3') |  | Purpose |
| Q-SHV-F |  | TAAAGTAGTGCTCTGCGGC |  | Foward primer for *bla*SHV qRT-PCR |
| Q-SHV-R |  | GCCTCATTCAGTTCCGTT |  | Reverse primer for *bla*SHV qRT-PCR |
| Q-gapA-F |  | ACTTCGACAAATATGCTGGC |  | Foward primer for *gapA* qRT-PCR |
| Q-gapA-R |  | CGGGATGATGTTCTGGGAA |  | Reverse primer for *gapA* qRT-PCR |
| Q-gfp-F |  | ACTTTCGCGTATGGTCTT |  | Foward primer for *gfp* qRT-PCR |
| Q-gfp-R |  | TAGTTCCCGTCATCTTTG |  | Reverse primer for *gfp* qRT-PCR |
